# Supplementary material
Source: PubMed Central journal article supplement (PMC7124980)

**Supplementary Table 1.** Types of HCV antiviral treatment regimens included in our study of VA patients from 1999-2015

|                  | <b>Regimen*</b>                             | <b>First Regimen<br/>N (%)</b> | <b>All Regimens<br/>N (%)</b> |
|------------------|---------------------------------------------|--------------------------------|-------------------------------|
| <b>IFN ONLY</b>  | Interferon                                  | 3,872(5.4)                     | 5,914(6.2)                    |
|                  | PEG                                         | 36,991(51.8)                   | 46,245(48.6)                  |
| <b>DAA + IFN</b> | Boceprevir+PEG                              | 3,185(4.5)                     | 4,968(5.2)                    |
|                  | Telaprevir+PEG                              | 498(0.7)                       | 997(1.0)                      |
|                  | Simeprevir+PEG                              | 14(0.0)                        | 23(0.0)                       |
|                  | Sofosbuvir+PEG                              | 1,046(1.5)                     | 1,834(1.9)                    |
| <b>DAA ONLY</b>  | Sofosbuvir (±daclatasvir)                   | 3,473(4.9)                     | 4,636(4.9)                    |
|                  | Sofosbuvir+Simeprevir                       | 2,068(2.9)                     | 3,331(3.5)                    |
|                  | Ledipasvir/Sofosbuvir                       | 15,055(21.1)                   | 20,539(21.6)                  |
|                  | Paritaprevir/Ritonavir/Ombitasvir/Dasabuvir | 5,255(7.4)                     | 6,602(6.9)                    |

\* Regimens with or without ribavirin were included together

DAA = direct acting antivirals, IFN = interferon, PEG = pegylated interferon

**Supplementary Table 2: Timing of HE vis-à-vis Treatment Initiation**

|         | Number of patients who developed HE after start of treatment | Number who developed HE <b>Within 90 days</b> of start-date (%) | Number who developed HE <b>Within 180 days</b> of start-date (%) | Number who developed HE <b>Within 360 days</b> of start-date (%) | Number who developed HE <b>before treatment end-date</b> (%) |
|---------|--------------------------------------------------------------|-----------------------------------------------------------------|------------------------------------------------------------------|------------------------------------------------------------------|--------------------------------------------------------------|
| IFN     | 4,270                                                        | 149(3.5)                                                        | 283(6.6)                                                         | 526(12.3)                                                        | 235(5.5)                                                     |
| IFN+DAA | 234                                                          | 28(12.0)                                                        | 50(21.4)                                                         | 86(36.8)                                                         | 44(18.8)                                                     |
| DAA     | 601                                                          | 115(19.1)                                                       | 175(29.1)                                                        | 291(48.4)                                                        | 113(18.8)                                                    |
| SVR     | 1,056                                                        | 112(10.6)                                                       | 187(17.7)                                                        | 319(30.2)                                                        | 159(15.1)                                                    |
| No SVR  | 4,049                                                        | 180(4.4)                                                        | 321(7.9)                                                         | 584(14.4)                                                        | 233(5.8)                                                     |

**Supplementary Table 3: Varying Cohort Entry Dates with Respect to Treatment Initiation has a Limited Effect on the Risk Estimates for Hepatic Encephalopathy**

|                                                                   |        | Number of patients (%) | Mean Follow-up (Years) | Number who developed HE (%) | HE incidence per 100 patient-years | Crude hazard ratio (95% CI) | Adjusted* hazard ratio (95% CI) |
|-------------------------------------------------------------------|--------|------------------------|------------------------|-----------------------------|------------------------------------|-----------------------------|---------------------------------|
| Analysis starting at 90 days from antiviral treatment initiation  |        |                        |                        |                             |                                    |                             |                                 |
| IFN-ONLY regimens                                                 | No SVR | 34,006(66.7)           | 8.6                    | 3,613(10.6)                 | 1.24                               | 1                           | 1                               |
|                                                                   | SVR    | 16,973(33.3)           | 10.6                   | 508(3.0)                    | 0.28                               | 0.23<br>(0.21-0.26)         | 0.26<br>(0.23-0.30)             |
| DAA+ IFN regimens                                                 | No SVR | 3,198(42.4)            | 3.3                    | 132(4.1)                    | 1.26                               | 1                           | 1                               |
|                                                                   | SVR    | 4,345(57.6)            | 5.2                    | 74(1.7)                     | 0.33                               | 0.27<br>(0.20-0.37)         | 0.31<br>(0.22-0.43)             |
| DAA-only regimens                                                 | No SVR | 3,336(10.2)            | 2.7                    | 124(3.7)                    | 1.39                               | 1                           | 1                               |
|                                                                   | SVR    | 29,414(89.8)           | 3.2                    | 362(1.2)                    | 0.39                               | 0.28<br>(0.22-0.35)         | 0.41<br>(0.32-0.51)             |
| Analysis starting at 180 days from antiviral treatment initiation |        |                        |                        |                             |                                    |                             |                                 |
| IFN-ONLY regimens                                                 | No SVR | 33,897(66.7)           | 8.6                    | 3,504(10.3)                 | 1.2                                | 1                           | 1                               |
|                                                                   | SVR    | 16,948(33.3)           | 10.6                   | 483(2.8)                    | 0.27                               | 0.22<br>(0.20-0.25)         | 0.25<br>(0.22-0.28)             |
| DAA+IFN regimens                                                  | No SVR | 3,182(42.3)            | 3.3                    | 116(3.6)                    | 1.1                                | 1                           | 1                               |
|                                                                   | SVR    | 4,339(57.7)            | 5.2                    | 68(1.6)                     | 0.3                                | 0.27<br>(0.20-0.37)         | 0.30<br>(0.22-0.43)             |
| DAA-only regimens                                                 | No SVR | 3,320(10.2)            | 2.7                    | 108(3.3)                    | 1.21                               | 1                           | 1                               |
|                                                                   | SVR    | 29,370(89.8)           | 3.2                    | 318(1.1)                    | 0.34                               | 0.28<br>(0.22-0.35)         | 0.39<br>(0.31-0.50)             |
| Analysis starting at 360 days from antiviral treatment initiation |        |                        |                        |                             |                                    |                             |                                 |
| IFN-ONLY regimens                                                 | No SVR | 33,697(66.6)           | 8.7                    | 3,304(9.8)                  | 1.13                               | 1                           | 1                               |
|                                                                   | SVR    | 16,905(33.4)           | 10.6                   | 440(2.6)                    | 0.24                               | 0.21<br>(0.19-0.24)         | 0.24<br>(0.21-0.27)             |
| DAA+                                                              | No SVR | 3,160(42.2)            | 3.3                    | 94(3.0)                     | 0.9                                | 1                           | 1                               |

|                                                               |        |              |      |             |      |                     |                     |
|---------------------------------------------------------------|--------|--------------|------|-------------|------|---------------------|---------------------|
| IFN regimens                                                  | SVR    | 4,325(57.8)  | 5.2  | 54(1.2)     | 0.24 | 0.24<br>(0.17-0.34) | 0.26<br>(0.18-0.38) |
| DAA-only regimens                                             | No SVR | 3,279(10.1)  | 2.7  | 67(2.0)     | 0.75 | 1                   | 1                   |
|                                                               | SVR    | 29,295(89.9) | 3.2  | 243(0.8)    | 0.26 | 0.33<br>(0.25-0.44) | 0.43<br>(0.32-0.59) |
| Analysis starting at the time antiviral treatment was stopped |        |              |      |             |      |                     |                     |
| IFN-ONLY regimens                                             | No SVR | 33,917(66.7) | 8.6  | 3,524(10.4) | 1.21 | 1                   | 1                   |
|                                                               | SVR    | 16,943(33.3) | 10.6 | 478(2.8)    | 0.27 | 0.22<br>(0.20-0.25) | 0.25<br>(0.22-0.28) |
| DAA+ IFN regimens                                             | No SVR | 3,189(42.4)  | 3.3  | 123(3.9)    | 1.17 | 1                   | 1                   |
|                                                               | SVR    | 4,335(57.6)  | 5.2  | 64(1.5)     | 0.28 | 0.24<br>(0.18-0.33) | 0.28<br>(0.20-0.39) |
| DAA-only regimens                                             | No SVR | 3,335(10.2)  | 2.7  | 123(3.7)    | 1.37 | 1                   | 1                   |
|                                                               | SVR    | 29,401(89.8) | 3.2  | 349(1.2)    | 0.37 | 0.27<br>(0.22-0.34) | 0.39<br>(0.31-0.49) |

**Supplementary Table 4.** Propensity Matched Analysis of the Association between SVR and the Risk of Developing Incident HE

|                   |        | Crude hazard ratio (95% CI) | Adjusted* hazard ratio (95%CI) | Crude hazard ratio with IPW± (95% CI) | Adjusted* hazard ratio with IPW± (95%CI) | Crude hazard ratio with trimmed IPW± (95% CI) | Adjusted* hazard ratio with trimmed IPW± (95%CI) |
|-------------------|--------|-----------------------------|--------------------------------|---------------------------------------|------------------------------------------|-----------------------------------------------|--------------------------------------------------|
| IFN-ONLY regimens | No SVR | 1                           | 1                              | 1                                     | 1                                        | 1                                             | 1                                                |
|                   | SVR    | 0.23<br>(0.21-0.26)         | 0.26<br>(0.23-0.30)            | 0.26<br>(0.23-0.30)                   | 0.26<br>(0.23-0.30)                      | 0.26<br>(0.23-0.30)                           | 0.26<br>(0.23-0.30)                              |
| DAA+IFN regimens  | No SVR | 1                           | 1                              | 1                                     | 1                                        | 1                                             | 1                                                |
|                   | SVR    | 0.27<br>(0.20-0.37)         | 0.32<br>(0.22-0.43)            | 0.32<br>(0.23-0.44)                   | 0.31<br>(0.22-0.43)                      | 0.30<br>(0.22-0.42)                           | 0.30<br>(0.21-0.42)                              |
| DAA-only regimens | No SVR | 1                           | 1                              | 1                                     | 1                                        | 1                                             | 1                                                |
|                   | SVR    | 0.28<br>(0.22-0.35)         | 0.41<br>(0.32-0.51)            | 0.35<br>(0.27-0.44)                   | 0.43<br>(0.34-0.54)                      | 0.32<br>(0.25-0.41)                           | 0.42<br>(0.33-0.53)                              |

\* Adjusted for regimen type, cirrhosis, decompensated cirrhosis, age, sex, race/ethnicity, body mass index, HBV co-infection, type 2 diabetes mellitus, ascites, varices, hepatocellular carcinoma, alcohol use disorders, substance use disorder, platelet count, serum bilirubin, serum creatinine, serum albumin, INR and blood hemoglobin levels. The laboratory tests were categorized into quartiles and modeled as dummy categorical variables.

±IPW Inverse probability weights based on propensity score estimates. Trimmed weights drop the largest and smallest 1% of propensity scores.

**Supplementary Table 5.** Association between SVR and the Risk of Developing Incident HE Accounting for the Competing Risk of Death

|                   |        | Crude hazard ratio<br>(95% CI) | Adjusted* hazard ratio<br>(95%CI) | Crude sub-hazard± ratio<br>(95% CI) | Adjusted* sub-hazard± ratio<br>(95%CI) |
|-------------------|--------|--------------------------------|-----------------------------------|-------------------------------------|----------------------------------------|
| IFN-ONLY regimens | No SVR | 1                              | 1                                 | 1                                   | 1                                      |
|                   | SVR    | 0.23<br>(0.21-0.26)            | 0.26<br>(0.23-0.30)               | 0.24<br>(0.22-0.27)                 | 0.29<br>(0.26-0.32)                    |
| DAA+IFN regimens  | No SVR | 1                              | 1                                 | 1                                   | 1                                      |
|                   | SVR    | 0.27<br>(0.20-0.37)            | 0.31<br>(0.22-0.43)               | 0.28<br>(0.21-0.38)                 | 0.33<br>(0.24-0.46)                    |
| DAA-only regimens | No SVR | 1                              | 1                                 | 1                                   | 1                                      |
|                   | SVR    | 0.28<br>(0.22-0.35)            | 0.41<br>(0.32-0.51)               | 0.29<br>(0.24-0.35)                 | 0.43<br>(0.35-0.54)                    |

\* Adjusted for regimen type, cirrhosis, decompensated cirrhosis, age, sex, race/ethnicity, body mass index, HBV co-infection, type 2 diabetes mellitus, ascites, varices, hepatocellular carcinoma, alcohol use disorders, substance use disorder, platelet count, serum bilirubin, serum creatinine, serum albumin, INR and blood hemoglobin levels. The laboratory tests were categorized into quartiles and modeled as dummy categorical variables.

±With death as a competing risk.

**Supplemental Table 6.** Association between SVR and the Risk of Hospitalization with HE, among patients without HE at baseline.

|                   |        | Number of patients (%) | Mean Follow-up (Years) | Number who were hospitalized for HE (%) | First HE hospitalization per 100 patient-years | Crude hazard ratio (95% CI) | Adjusted* hazard ratio (95%CI) |
|-------------------|--------|------------------------|------------------------|-----------------------------------------|------------------------------------------------|-----------------------------|--------------------------------|
| IFN-ONLY regimens | No SVR | 34,006(66.7)           | 8.9                    | 1,948(5.7)                              | 0.65                                           | 1                           | 1                              |
|                   | SVR    | 16,973(33.3)           | 10.7                   | 292(1.7)                                | 0.16                                           | 0.24(0.21-0.28)             | 0.28(0.24-0.33)                |
| DAA+IFN regimens  | No SVR | 3,198(42.4)            | 3.3                    | 43(1.3)                                 | 0.4                                            | 1                           | 1                              |
|                   | SVR    | 4,345(57.6)            | 5.2                    | 39(0.9)                                 | 0.17                                           | 0.39(0.26-0.61)             | 0.43(0.26-0.70)                |
| DAA-only regimens | No SVR | 3,336(10.2)            | 2.7                    | 54(1.6)                                 | 0.6                                            | 1                           | 1                              |
|                   | SVR    | 29,414(89.8)           | 3.2                    | 298(1.0)                                | 0.32                                           | 0.52(0.38-0.70)             | 0.59(0.43-0.81)                |

\* Adjusted for regimen type, cirrhosis, decompensated cirrhosis, age, sex, race/ethnicity, body mass index, HBV co-infection, type 2 diabetes mellitus, ascites, varices, hepatocellular carcinoma, alcohol use disorders, substance use disorder, platelet count, serum bilirubin, serum creatinine, serum albumin, INR and blood hemoglobin levels. The laboratory tests were categorized into quartiles and modeled as dummy categorical variables.

**Supplemental Table 7.** Association between SVR and the number of hospitalizations in the first three years after treatment start, among patients without HE at baseline.

|                   |        | Number of patients (%) | Mean number of hospitalizations for HE (SD) | Incident rate ratio of number of hospitalizations for HE | Adjusted* incident rate ratio of number of hospitalizations for HE |
|-------------------|--------|------------------------|---------------------------------------------|----------------------------------------------------------|--------------------------------------------------------------------|
| IFN-ONLY regimens | No SVR | 34,006(66.7)           | 0.14( 0.77)                                 | 1                                                        | 1                                                                  |
|                   | SVR    | 16,973(33.3)           | 0.03( 0.32)                                 | 0.22(0.17-0.28)                                          | 0.25(0.21-0.31)                                                    |
| DAA+IFN regimens  | No SVR | 3,198(42.4)            | 0.03( 0.29)                                 | 1                                                        | 1                                                                  |
|                   | SVR    | 4,345(57.6)            | 0.01( 0.12)                                 | 0.34(0.21-0.55)                                          | 0.59(0.38-0.92)                                                    |
| DAA-only          | No SVR | 3,336(10.2)            | 0.02( 0.15)                                 | 1                                                        | 1                                                                  |



**Supplementary Table 8.** Propensity Matched Analysis of the Association between SVR and Resolution of Hepatic Encephalopathy

|                   |        | Crude hazard ratio (95% CI) | Adjusted* hazard ratio (95% CI) | Crude hazard ratio with IPW± (95% CI) | Adjusted* hazard ratio with IPW± (95% CI) | Crude hazard ratio with trimmed IPW± (95% CI) | Adjusted* hazard ratio with trimmed IPW± (95% CI) |
|-------------------|--------|-----------------------------|---------------------------------|---------------------------------------|-------------------------------------------|-----------------------------------------------|---------------------------------------------------|
| IFN-ONLY regimens | No SVR | 1                           | 1                               | 1                                     | 1                                         | 1                                             | 1                                                 |
|                   | SVR    | 2.08<br>(1.62-2.68)         | 2.10<br>(1.57-2.82)             | 2.24<br>(1.70-2.97)                   | 2.32<br>(1.76-3.07)                       | 2.01<br>(1.50-2.68)                           | 2.09<br>(1.55-2.81)                               |
| DAA+IFN regimens  | No SVR | 1                           | 1                               | 1                                     | 1                                         | 1                                             | 1                                                 |
|                   | SVR    | 1.88<br>(1.12-3.16)         | 1.39<br>(0.60-3.18)             | 1.86<br>(1.02-3.39)                   | 1.34<br>(0.56-3.18)                       | 2.09<br>(1.17-3.75)                           | 1.39<br>(0.58-3.30)                               |
| DAA-only regimens | No SVR | 1                           | 1                               | 1                                     | 1                                         | 1                                             | 1                                                 |
|                   | SVR    | 1.59<br>(1.21-2.09)         | 1.39<br>(1.03-1.87)             | 1.53<br>(1.13-2.07)                   | 1.28<br>(0.95-1.72)                       | 1.59<br>(1.17-2.15)                           | 1.28<br>(0.95-1.74)                               |

\* Adjusted for regimen type, cirrhosis, decompensated cirrhosis, age, sex, race/ethnicity, body mass index, HBV co-infection, type 2 diabetes mellitus, ascites, varices, hepatocellular carcinoma, alcohol use disorders, substance use disorder, platelet count, serum bilirubin, serum creatinine, serum albumin, INR and blood hemoglobin levels. The laboratory tests were categorized into quartiles and modeled as dummy categorical variables.

±IPW Inverse probability weights based on propensity score estimates. Trimmed weights drop the largest and smallest 1% of propensity scores.

**Supplementary Table 9.** Competing Risks (Fine-Gray) Analysis of the Association between SVR and Resolution of Hepatic Encephalopathy

|                   |        | Crude hazard ratio (95% CI) | Adjusted* hazard ratio (95% CI) | Crude sub-hazard $\pm$ ratio (95% CI) | Adjusted* sub-hazard $\pm$ ratio (95% CI) |
|-------------------|--------|-----------------------------|---------------------------------|---------------------------------------|-------------------------------------------|
| IFN-ONLY regimens | No SVR | 1                           | 1                               | 1                                     | 1                                         |
|                   | SVR    | 2.08<br>(1.62-2.68)         | 2.10<br>(1.57-2.82)             | 2.32<br>(1.86-2.91)                   | 2.26<br>(1.73-2.96)                       |
| DAA+IFN regimens  | No SVR | 1                           | 1                               | 1                                     | 1                                         |
|                   | SVR    | 1.88<br>(1.12-3.16)         | 1.39<br>(0.60-3.18)             | 1.99<br>(1.21-3.28)                   | 1.40<br>(0.63-3.15)                       |
| DAA-only regimens | No SVR | 1                           | 1                               | 1                                     | 1                                         |
|                   | SVR    | 1.59<br>(1.21-2.09)         | 1.39<br>(1.03-1.87)             | 1.75<br>(1.34-2.29)                   | 1.51<br>(1.13-2.01)                       |

\* Adjusted for regimen type, cirrhosis, decompensated cirrhosis, age, sex, race/ethnicity, body mass index, HBV co-infection, type 2 diabetes mellitus, ascites, varices, hepatocellular carcinoma, alcohol use disorders, substance use disorder, platelet count, serum bilirubin, serum creatinine, serum albumin, INR and blood hemoglobin levels. The laboratory tests were categorized into quartiles and modeled as dummy categorical variables.

$\pm$ With death as a competing risk.

**Supplemental Table 10.** Association between SVR and the Risk of Hospitalization with HE, among patients who were on HE medications at baseline

|                    |        | Number of patients (%) | Mean Follow-up (Years) | Number who were hospitalized for HE (%) | First HE hospitalization per 100 patient-years | Crude hazard ratio (95% CI) | Adjusted* hazard ratio (95% CI) |
|--------------------|--------|------------------------|------------------------|-----------------------------------------|------------------------------------------------|-----------------------------|---------------------------------|
| IFN -ONLY regimens | No SVR | 983(83.3)              | 5.9                    | 239(24.3)                               | 4.12                                           | 1                           | 1                               |
|                    | SVR    | 197(16.7)              | 8.4                    | 28(14.2)                                | 1.69                                           | 0.44(0.28-0.69)             | 0.53(0.35-0.83)                 |
| DAA+IFN regimens   | No SVR | 167(59.9)              | 2.8                    | 25(15.0)                                | 5.37                                           | 1                           | 1                               |
|                    | SVR    | 112(40.1)              | 4.4                    | 10(8.9)                                 | 2.03                                           | 0.44(0.20-0.99)             | 0.52(0.15-1.83)                 |
| DAA-only regimens  | No SVR | 497(21.1)              | 2.1                    | 58(11.7)                                | 5.59                                           | 1                           | 1                               |
|                    | SVR    | 1,861(78.9)            | 2.9                    | 179(9.6)                                | 3.35                                           | 0.67(0.49-0.91)             | 0.79(0.57-1.10)                 |

\* Adjusted for regimen type, cirrhosis, decompensated cirrhosis, age, sex, race/ethnicity, body mass index, HBV co-infection, type 2 diabetes mellitus, ascites, varices, hepatocellular carcinoma, alcohol use disorders, substance use disorder, platelet count, serum bilirubin, serum creatinine, serum albumin, INR and blood hemoglobin levels. The laboratory tests were categorized into quartiles and modeled as dummy categorical variables.

Journal Pre-proof

**Supplemental Table 11.** Association between SVR and number of hospitalizations in the first three years after treatment start for patients with treated HE at baseline

|                    |        | Number of patients (%) | Mean number of hospitalizations for HE (SD) | Incident rate ratio of number of hospitalizations for HE | Adjusted* incident rate ratio of number of hospitalizations for HE |
|--------------------|--------|------------------------|---------------------------------------------|----------------------------------------------------------|--------------------------------------------------------------------|
| IFN -ONLY regimens | No SVR | 983(83.3)              | 0.84( 2.09)                                 | 1                                                        | 1                                                                  |
|                    | SVR    | 197(16.7)              | 0.31( 1.17)                                 | 0.38(0.17-0.84)                                          | 0.28(0.19-0.41)                                                    |
| DAA+IFN regimens   | No SVR | 167(59.9)              | 0.29( 0.79)                                 | 1                                                        | 1                                                                  |
|                    | SVR    | 112(40.1)              | 0.14( 0.55)                                 | 0.49(0.21-1.12)                                          | 0.56(0.25-1.26)                                                    |
| DAA-only regimens  | No SVR | 497(21.1)              | 0.28( 0.89)                                 | 1                                                        | 1                                                                  |
|                    | SVR    | 1,861(78.9)            | 0.19( 0.67)                                 | 0.70(0.51-0.96)                                          | 0.80(0.60-1.07)                                                    |

\* Adjusted for regimen type, cirrhosis, decompensated cirrhosis, age, sex, race/ethnicity, body mass index, HBV co-infection, type 2 diabetes mellitus, ascites, varices, hepatocellular carcinoma, alcohol use disorders, substance use disorder, platelet count, serum bilirubin, serum creatinine, serum albumin, INR and blood hemoglobin levels. The laboratory tests were categorized into quartiles and modeled as dummy categorical variables

Journal Pre-proof

**Supplementary Figure 1. Kaplan-Meier curves comparing the cumulative incidence of HE development in patients who achieved SVR versus those who did not, among all patients or clinically-relevant subgroups.**

NOTE: Left plots use inverse probability weights (IPW) based on the propensity scores (PS). Plots on the right use trimmed (largest and smallest PS dropped) IPW

**A. ALL PATIENTS**

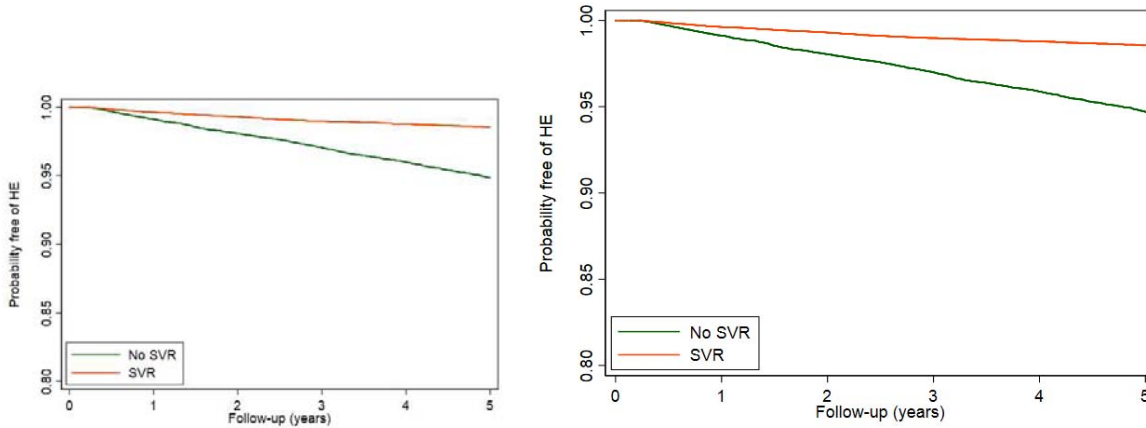

**B. ACCORDING TO ANTIVIRAL REGIMEN**

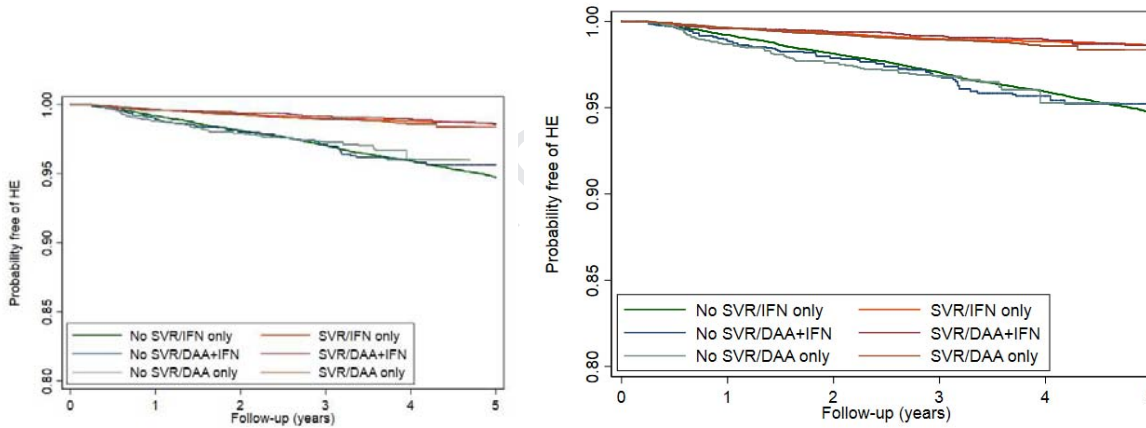

**C. ACCORDING TO PRESENCE/ABSENCE OF CIRRHOSIS**

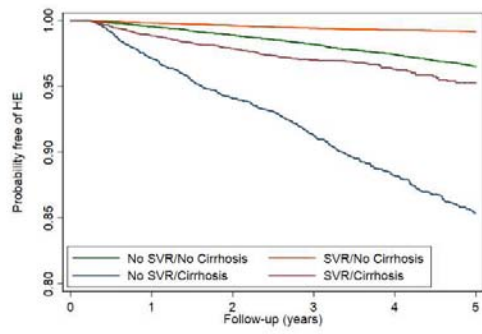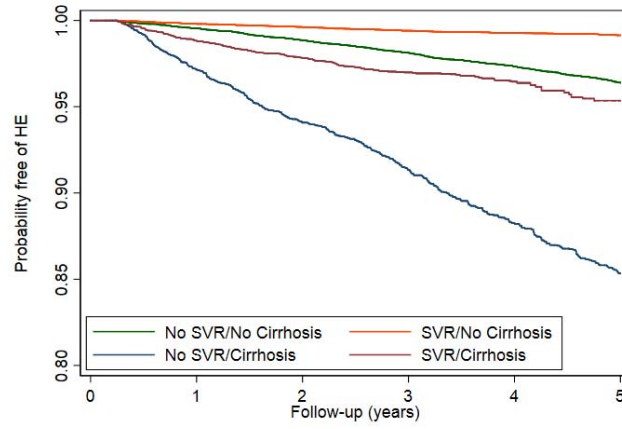

Journal Pre-proof

**Supplementary Figure 2. Cumulative-probability curves comparing the resolution of HE in patients with SVR versus those without SVR among all patients or clinically-relevant subgroups.**

NOTE: Left plots use inverse probability weights (IPW) based on the propensity scores (PS). Plots on the right use trimmed (largest and smallest PS dropped) IPW

**A. ALL PATIENTS**

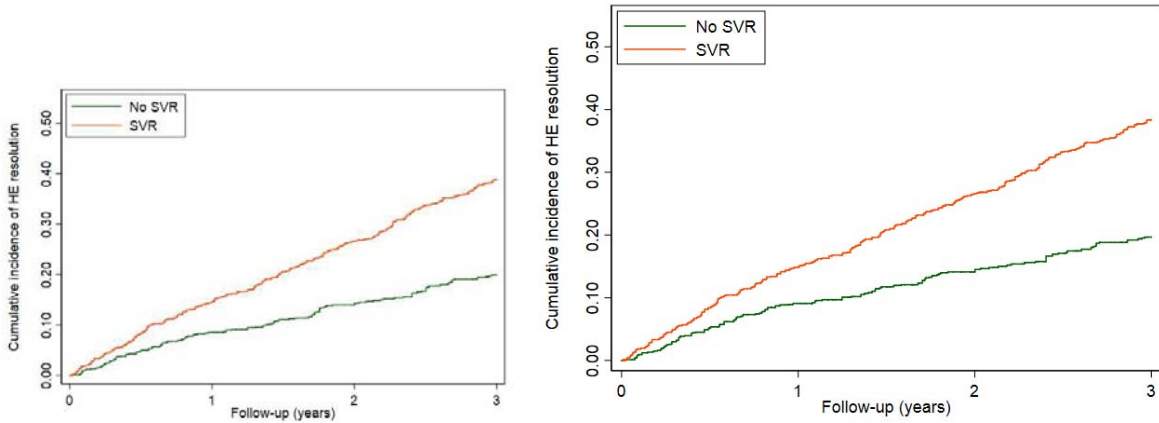

**B. BY ANTIVIRAL REGIMEN**

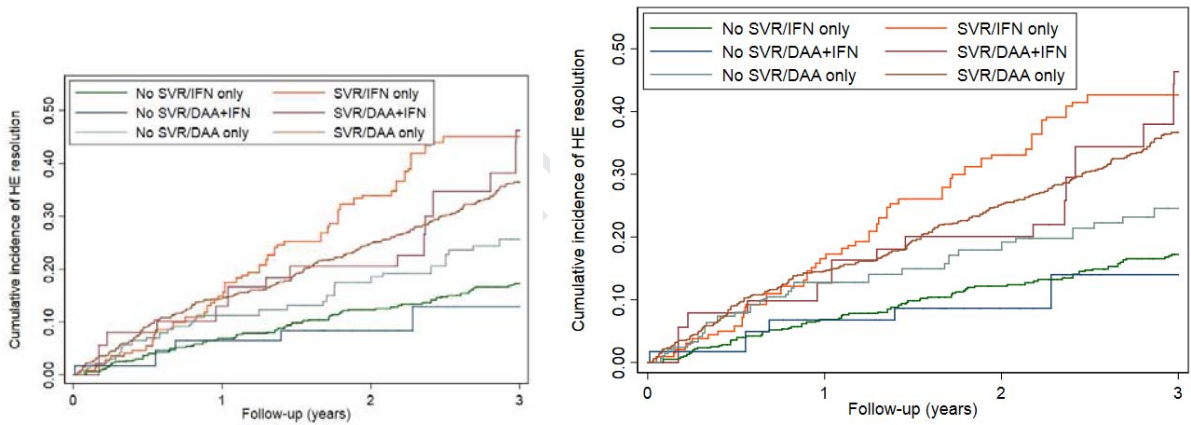

**C. BY MELD CATEGORY**

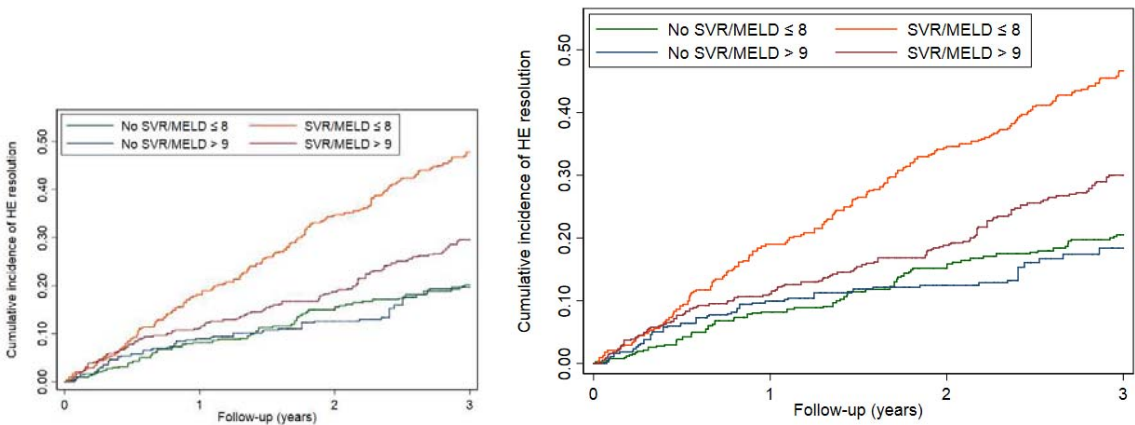

Supplement: NIHMS1544051-supplement-1.pdf [file NIHMS1544051-supplement-1.pdf]
